# Supplementary material for: Anticancer Potential of Green Synthesized Silver Nanoparticles of the Soft Coral Cladiella pachyclados Supported by Network Pharmacology and In Silico Analyses
Source: MDPI journal article supplement (doi:10.3390/pharmaceutics13111846), 2021-11-03
Supplement: s1 [file s1]

# Supplementary Materials: Anticancer Potential of Green Synthesized Silver Nanoparticles of the Soft Coral *Cladiella pachyclados* Supported by Network Pharmacology and In Silico Analyses

Hani A. Alhadrami, Heba Alkhatibi, Fahad H. Abduljabbar, Usama Ramadan Abdelmohsen and Ahmed M. Sayed

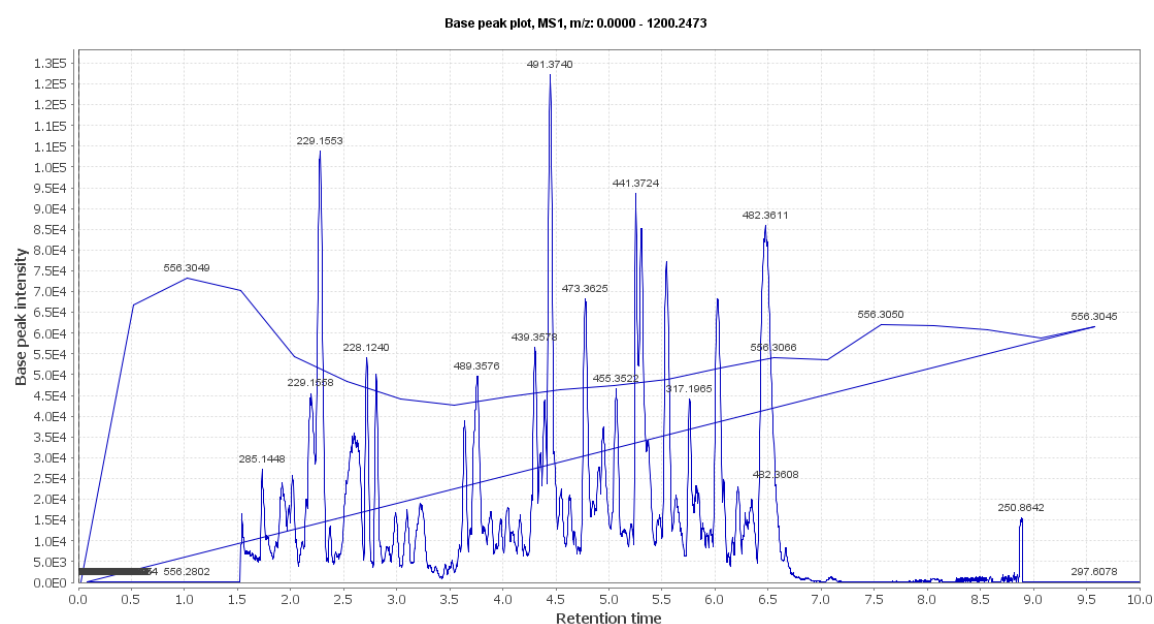

**Figure S1.** LC-HRESIMS base peak intensity (positive mode) chromatogram of CE.

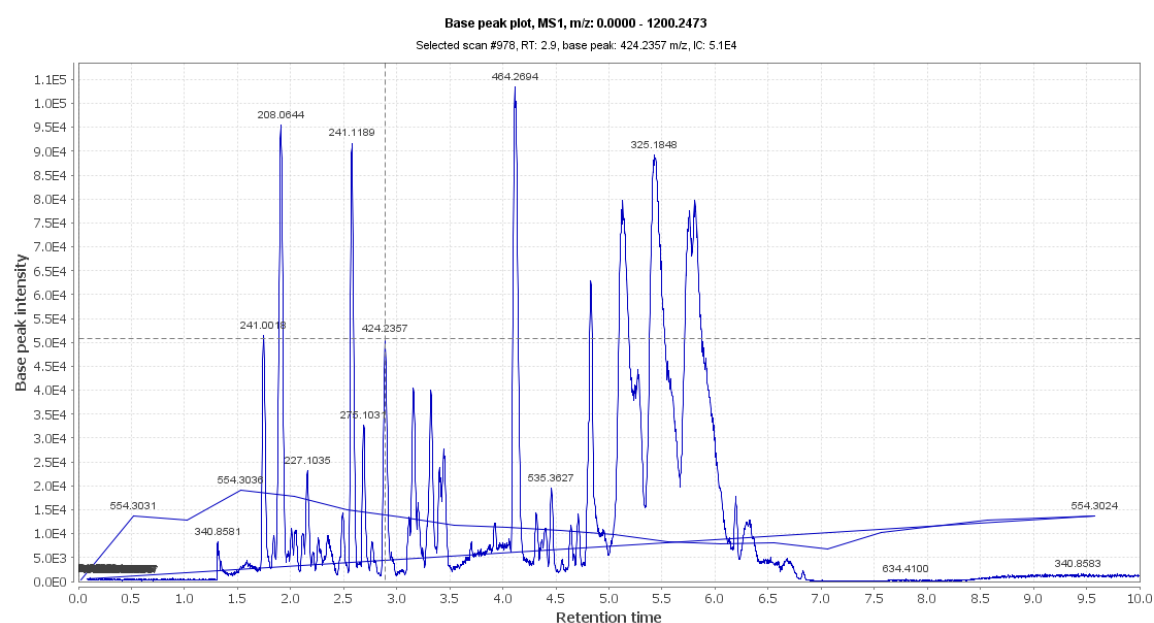

**Figure S2.** LC-HRESIMS base peak intensity (negative mode) chromatogram of CE.

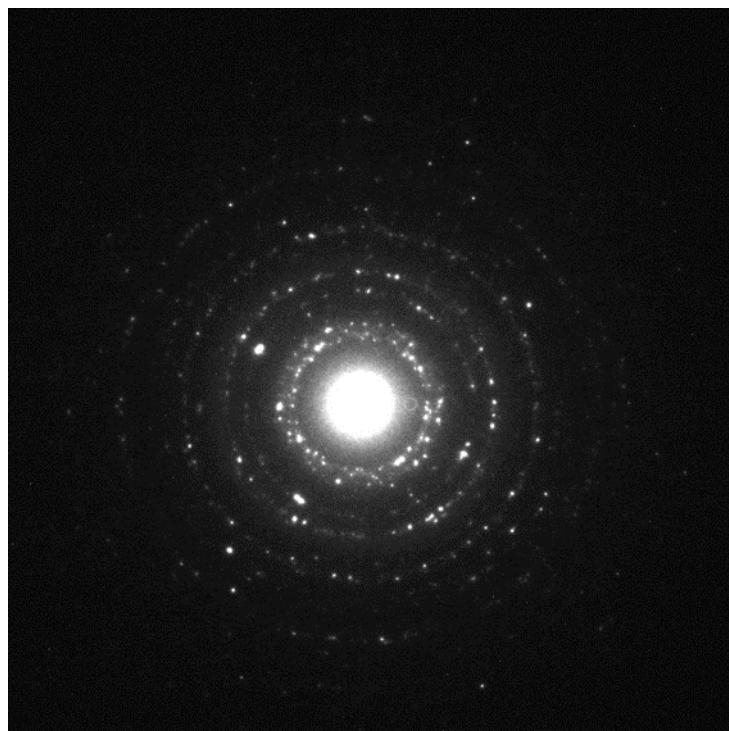

**Figure S3.** SAED images for as-prepared CE-AgNPs.

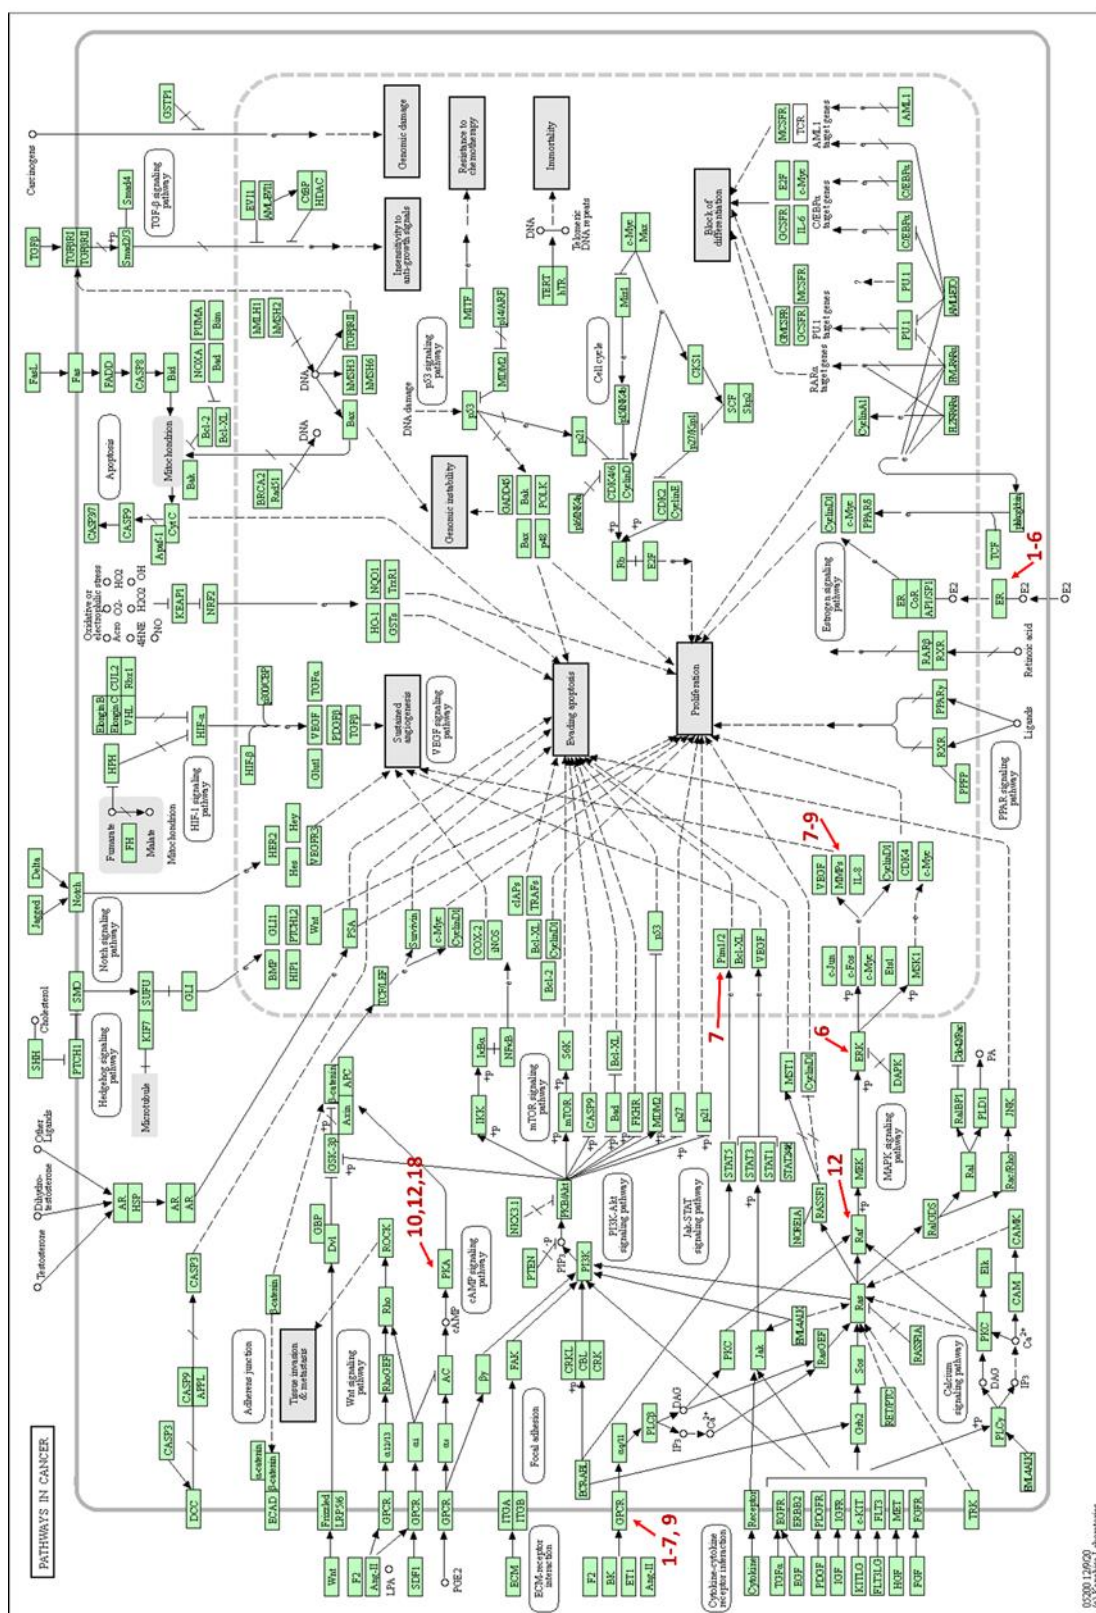

**Figure S4.** KEGG-derived signaling Pathways in cancer. Red-colored numbers and arrows indicate CE-derived metabolites that were predicted to target a number of BC-related proteins

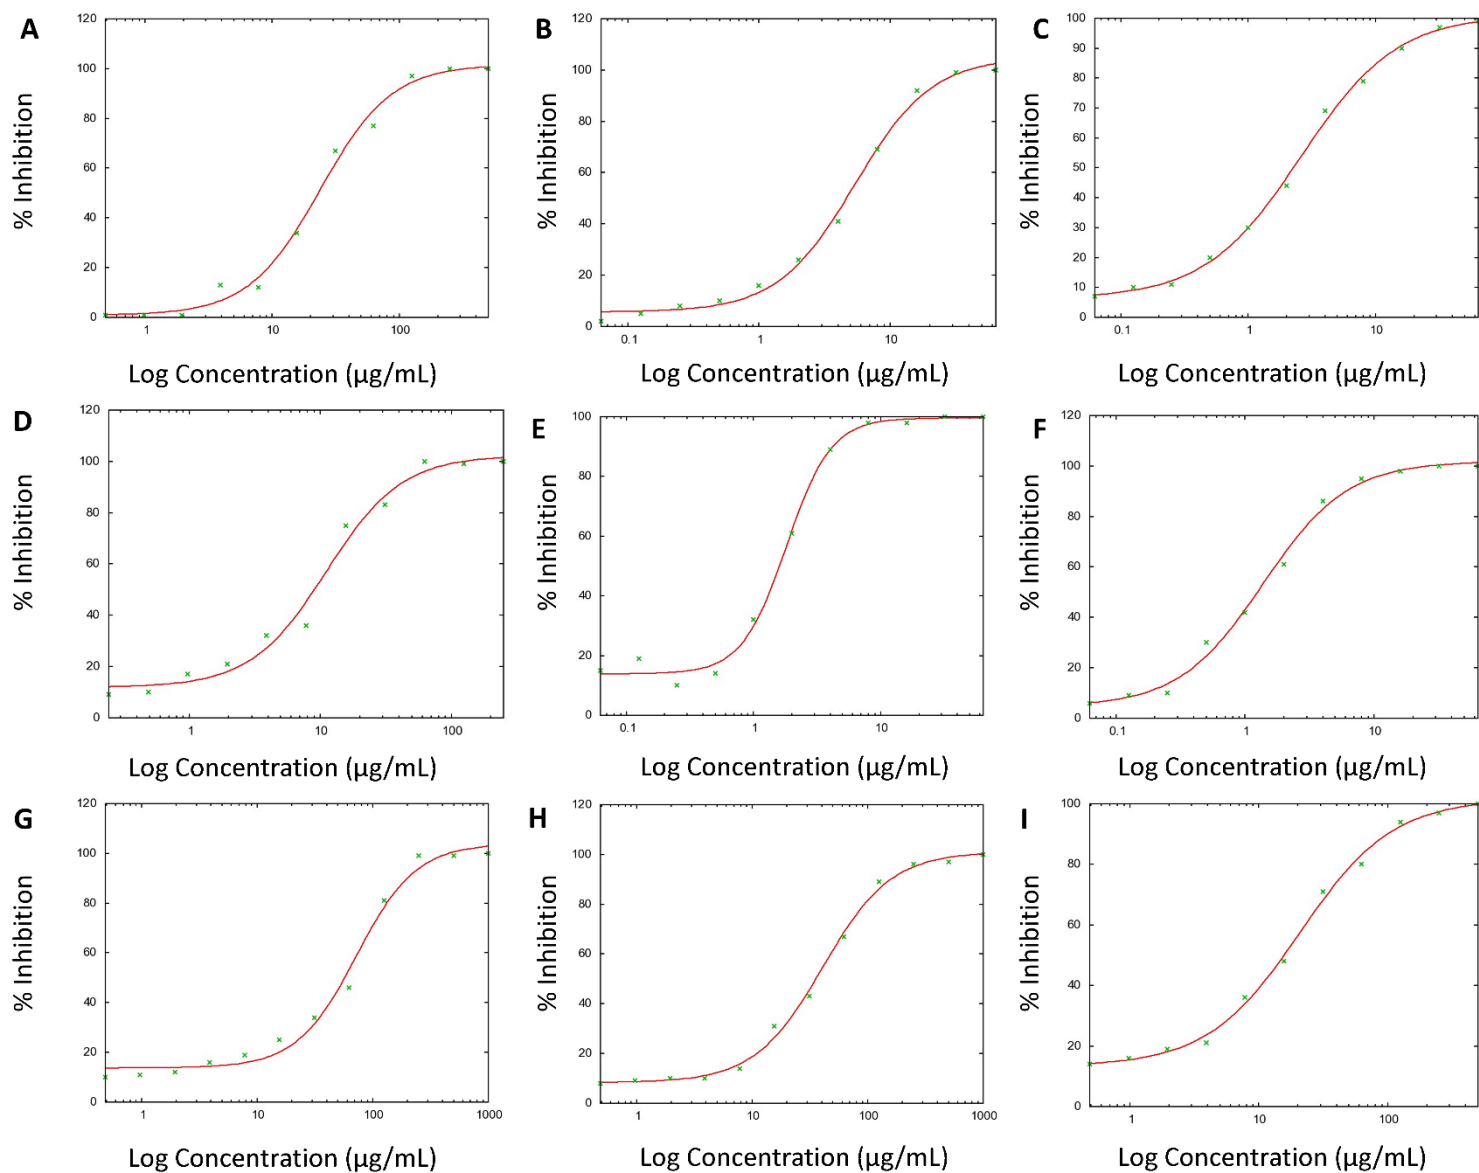

**Figure S5.** Dose-response curves of CE, AgNPs, and Doxorubicin against MCF7 (A-C), MDA-MB-231 (D-F), and MCF10a (G-I), respectively.

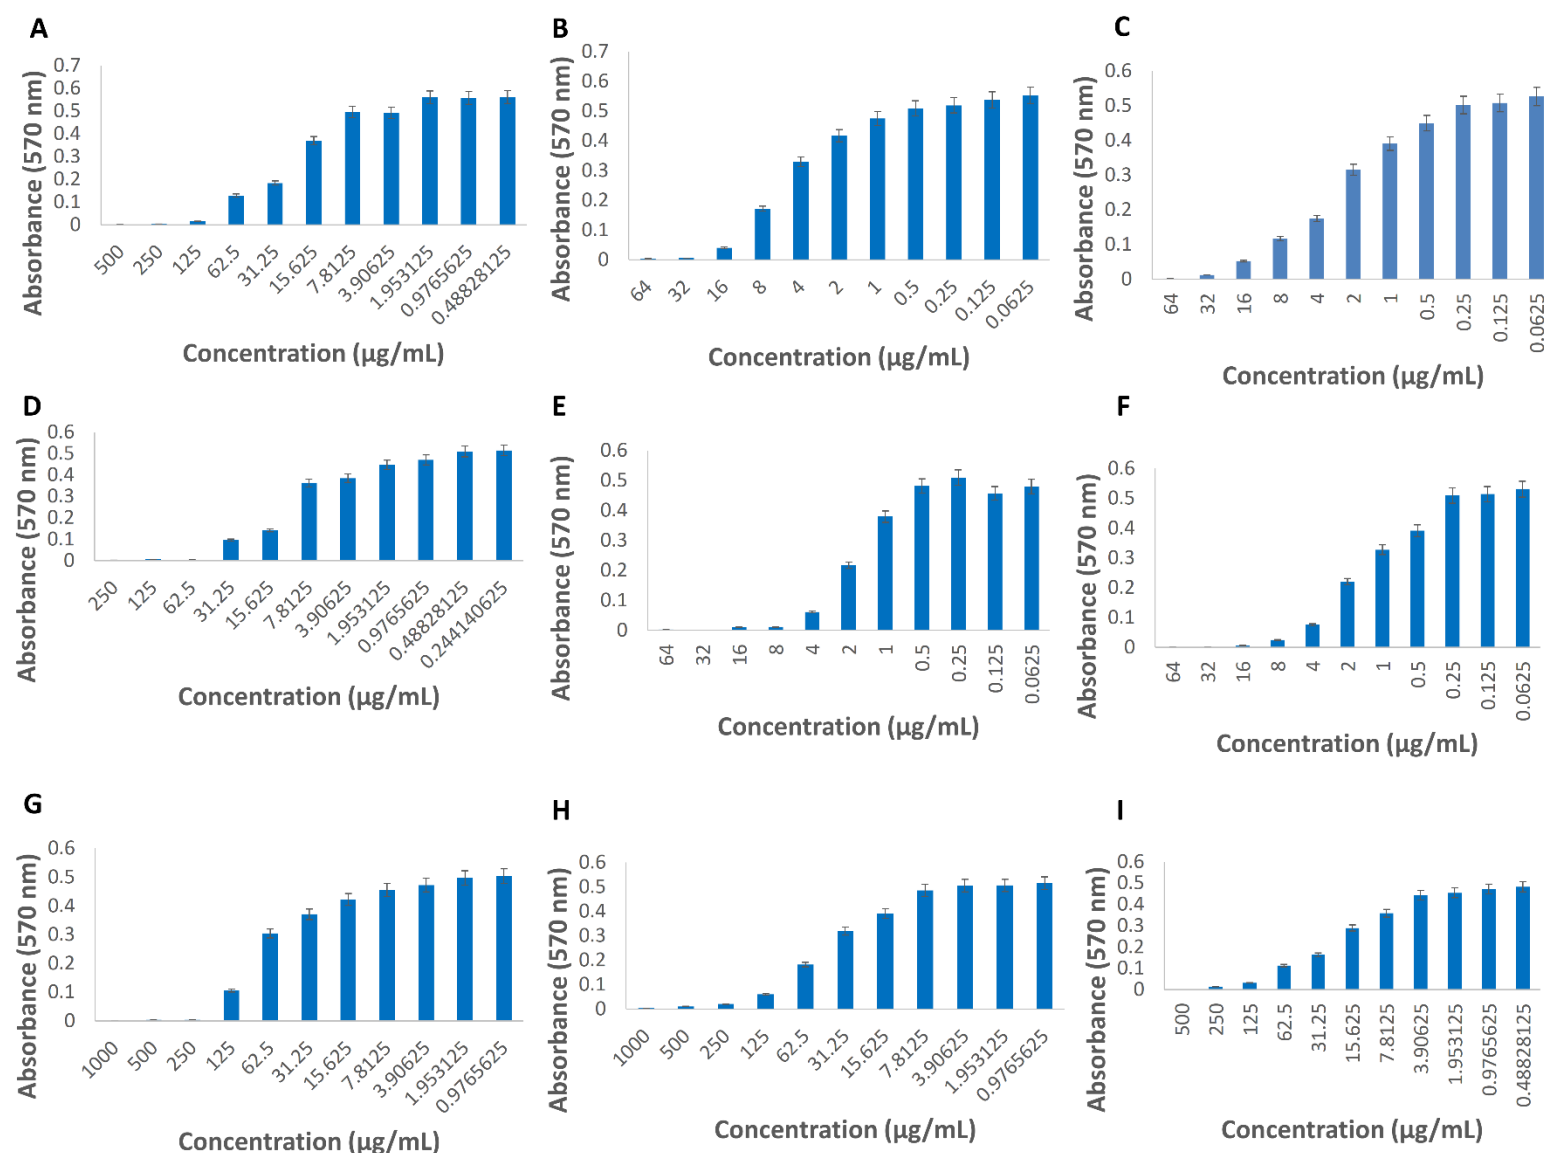

**Figure S6.** MTT cytotoxicity assay results of CE, AgNPs, and Doxorubicin against MCF7 (A-C), MDA-MB-231 (D-F), and MCF10a (G-I), respectively. These histograms shows the absorbance of MTT -stained cells upon their treatment by various concentrations of CE, AgNPs, and Doxorubicin.

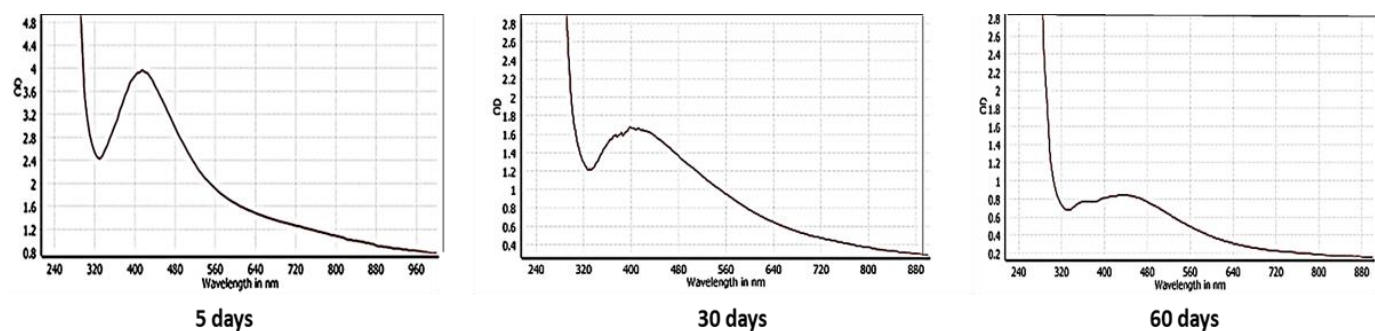

**Figure S7.** AgNPs stability monitored by determination of surface plasmon band (SPB) after (5, 30, 60 days).

**Table S1.** All collected BC-related targets (242 targets).

| Target Abbreviation |        |         |          |          |          |           |
|---------------------|--------|---------|----------|----------|----------|-----------|
| MAPK3               | FYN    | CYP19A1 | BCAT1    | CDKN2B   | MYC      | TAB1,     |
| EP300               | RARG   | ALOX5   | COL13A1a | CEBPB    | NFKB1,   | TAB2,     |
| SRC                 | AKR1C3 | MMP8    | EXT1     | CFLAR    | NRAS,    | TCF7      |
| RXRA                | RARB   | ALOX15  | LIMCH1a  | CHEK1    | PDGFB,   | TFRC,     |
| ADRA2A              | NR3C1  | ALOX12  | AKR1B1a  | CREB3L2  | PDGFC,   | TGFB1,    |
| ADRA2C              | ARG1   | TACR1   | CNN3a    | CSF1R    | PDGFRB,  | TGFBR1,   |
| ADRA2B              | PTPN6  | PTPN1   | CYBRD1   | CTNND1   | PDK1,    | TGFBR2,   |
| PRKCD               | PRKCH  | AURKB   | FXVD5    | CX3CL1   | PGK1,    | THBS1,    |
| VEGFA               | ELANE  | CDC25A  | SRGNa    | CXCL10   | PIK3CA,  | TIMP1,    |
| DRD2                | NOS3   | CDC25B  | IFI16a   | CXCL11   | PIM1,    | TNF,      |
| CNR1                | PPARA  | LDHA    | IGFBP7a  | CXCL16   | PLA2G4A, | TNFRSF1A, |
| MAPK14              | PTK2   | NR1H2   | TMEM158  | CXCL8    | PLK1     | TNFRSF1B, |
| DRD3                | FABP5  | ALB     | GNG11a   | CXCL9    | PMAIP1,  | TRAF2,    |
| OPRM1               | IGF1R  | TYMS    | PLAC8a   | DDIT3    | PRKX,    | VEGF      |
| GABBR1              | MDM2   | PTGES   | SRPX     | DDIT4    | PTGS2,   |           |
| ADORA3              | PPARG  | HDAC6   | AGPS     | EGFR     | PTK2     |           |
| CNR2                | FDFT1  | MMP2    | PTRF     | EIF4EBP1 | PTPN11,  |           |
| MTNR1A              | BCL2   | ESR2    | ACKR3,   | ETS1     | PTPRF,   |           |
| MTNR1B              | PTGS2  | PPARD   | BAMBI,   | GAPDH    | RAF1     |           |
| PTGER3              | CDK2   | CRHR1   | BIRC5,   | GRB2     | RALBP1,  |           |
| NPY5R               | MPO    | PTGER2  | BNIP3,   | GSK3B    | RASGRP2, |           |
| CCR1                | MMP9   | PTGER4  | BRAF,    | GTSE1    | RASSF1,  |           |
| HCAR2               | NR1H3  | NEK2    | CCL13,   | HIF1A    | RASSF5,  |           |
| RXRB                | PTGS1  | BCL2L1  | CCL5,    | HSPB1    | RHEB,    |           |

|        |         |          |         |         |                |  |
|--------|---------|----------|---------|---------|----------------|--|
| EGFR   | SREBF2  | KLK2     | CCND1,  | IGFBP3  | RHOA,          |  |
| RXRG   | MET     | HDAC8    | CCNG2,  | INHBA   | RPS6,          |  |
| PTPN11 | VDR     | TBXAS1   | CCR2,   | IRAK1   | RRAS           |  |
| KAT2B  | ADRB2   | MMP1     | CCR7,   | IRF3    | SER-<br>PINB5, |  |
| ESR1   | TTR     | CA9      | CD19,   | LAMTOR3 | SER-<br>PINE1, |  |
| PRKCG  | CYP2C19 | PGF      | CD27,   | LTBP1   | SIAH1,         |  |
| RARA   | PTGDR   | SERPINE1 | CD70,   | LYN     | SLC2A1,        |  |
| CDK1   | FABP4   | TERT     | CD86,   | MAP2K1  | SMO            |  |
| PRKCB  | AR      | PIN1     | CDC25B, | MAP2K2  | SPI1,          |  |
| LCK    | FABP1   | RORA     | CDC42,  | MAP3K13 | SPP1           |  |
| PRKCE  | PTPN2   | MCL1     | CDH1,   | MAX     | SRC            |  |
| KDR    | NOS2    | HSD11B1  | CDK2,   | MET     | STAT1,         |  |
| PRKCQ  | FUCA1   | PLA2G1B  | CDK4,   | MLLT4   | STMN1,         |  |
| HIF1A  | TOP2A   | ADORA2B  | CDKN2A, | MRAS    | SYK            |  |

**Table S2.** BC-related targets that were predicted to be inhibited by CE-derived compounds.

| Target abbreviation | Target name                                           | PDB code | Targeted by                      | Hub Protein |
|---------------------|-------------------------------------------------------|----------|----------------------------------|-------------|
| ERK1                | MAP kinase ERK1                                       | 4QTB     | 6 (validated by MDS)             | Yes         |
| PRKCD               | Protein kinase C delta                                | 1PTR     | 9, 12                            | No          |
| PTGER3              | Prostaglandin E2 receptor EP3 subtype                 | 6AK3     | 1-6                              | No          |
| ESR1                | Estrogen receptor                                     | 1SJ0     | 1-6                              | Yes         |
| PRKCQ               | Protein kinase C theta                                | 1XJD     | 9                                | No          |
| NR3C1               | Glucocorticoid receptor                               | 6EL9     | 3, 5                             | Yes         |
| MMP9                | Matrix metalloproteinase-9                            | 1JKC     | 7-9 (validated by MDS)           | No          |
| PTGS1               | Prostaglandin G/H synthase 1                          | 6Y3C     | 1-3                              | No          |
| CYP2C19             | Cytochrome P450 2C19                                  | 4GQS     | 1-4                              | No          |
| CYP19A1             | Cytochrome P450 19A1 (Aromatase)                      | 3S79     | 3-6 (5, 6 were validated by MDS) | No          |
| ALOX15              | Arachidonate 15-lipoxygenase                          | 4NRE     | 18                               | No          |
| CDC25B              | M-phase inducer phosphatase 2                         | 4WH7     | 2, 5                             | No          |
| PTGES               | Prostaglandin E synthase                              | 3DWW     | 1                                | No          |
| MMP2                | 72 kDa type IV collagenase                            | 1HOV     | 7 (validated by MDS)             | No          |
| ESR2                | Estrogen receptor beta                                | 3OLS     | 1, 5, 6                          | No          |
| MMP1                | Interstitial collagenase                              | 1CGE     | 7, 8 (validated by MDS)          | No          |
| BCAT1               | Branched-chain-amino-acid aminotransferase, cytosolic | 2COI     | 8, 16                            | No          |



|        |                                                    |      |                                  |     |
|--------|----------------------------------------------------|------|----------------------------------|-----|
| PIM1   | Serine/threonine-protein kinase PIM1               | 5C1Q | 7                                | No  |
| PTGS2  | Cyclooxygenase-2                                   | 6BL4 | 9                                | No  |
| RAF1   | RAF proto-oncogene serine/threonine-protein kinase | 1C1Y | 12                               | No  |
| RRAS   | Ras-related protein R-Ras                          | 2FN4 | 12, 18                           | No  |
| SLC2A1 | Glucose transporter                                | 5C65 | 7, 9                             | No  |
| SRC    | Proto-oncogene tyrosine-protein kinase Src         | 1A07 | 12, 18                           | Yes |
| PLK1   | Serine/threonine-protein kinase PLK1               | 1UMW | 12, 18 (12 was validated by MDS) | No  |
| PTK2   | Focal adhesion kinase 1                            | 1K04 | 11, 12, 18                       | Yes |
| CDK1   | Cyclin-dependent kinase 1                          | 6GU6 | 12, 18                           | Yes |

**Table S3.** KEGG signaling pathway enrichment.

| Description                                          | Number of genes | FDR value | Genes                                                             |
|------------------------------------------------------|-----------------|-----------|-------------------------------------------------------------------|
| Pathways in cancer                                   | 12              | 2.9E-10   | MMP2 RAF1 MAPK3 MMP1 PTK2 ESR2 PTGER3 PTGS2 MMP9 PIM1 ESR1 SLC2A1 |
| Estrogen signaling pathway                           | 8               | 1.25E-09  | MMP2 RAF1 MAPK3 ESR2 MMP9 SRC PRKCD ESR1                          |
| Proteoglycans in cancer                              | 8               | 1.45E-08  | MMP2 RRAS RAF1 MAPK3 PTK2 MMP9 SRC ESR1                           |
| C-type lectin receptor signaling pathway             | 6               | 3.88E-07  | RRAS RAF1 MAPK3 PTGS2 SRC PRKCD                                   |
| MicroRNAs in cancer                                  | 6               | 2.56E-06  | RAF1 MAPK3 PTK2 PTGS2 SRC                                         |
| VEGF signaling pathway                               | 5               | 9.55E-07  | PTGES PTGS1 PTGS2 CYP2C19 ALOX15                                  |
| Arachidonic acid metabolism                          | 5               | 1.05E-06  | CDC25B RAF1 MAPK3 PTGS2 MMP9 PIM1                                 |
| Autophagy - animal                                   | 5               | 2.25E-05  | RRAS RAF1 MAPK3 PRKCQ PRKCD                                       |
| Chemokine signaling pathway                          | 5               | 0.00011   | RAF1 MAPK3 PTK2 SRC PRKCD                                         |
| Regulation of actin cytoskeleton                     | 5               | 0.00016   | MAPK3 MMP1 PTGS2 MMP9                                             |
| IL-17 signaling pathway                              | 4               | 0.00015   | RRAS RAF1 MAPK3 PTK2 SRC                                          |
| AGE-RAGE signaling pathway in diabetic complications | 4               | 0.00018   | MMP2 MAPK3 PIM1 PRKCD                                             |
| Breast cancer                                        | 4               | 0.00068   | RAF1 MAPK3 ESR2 ESR1                                              |
| Cellular senescence                                  | 4               | 0.00073   | RRAS RAF1 MAPK3 CDK1                                              |
| Focal adhesion                                       | 4               | 0.0016    | RAF1 MAPK3 SLC2A1                                                 |
| Rap1 signaling pathway                               | 4               | 0.0017    | RAF1 MAPK3 PTK2 SRC                                               |
| cAMP signaling pathway                               | 4               | 0.0018    | RRAS RAF1 MAPK3 SRC                                               |
| MAPK signaling pathway                               | 4               | 0.0048    | RAF1 MAPK3 SRC                                                    |
| Central carbon metabolism in cancer                  | 3               | 0.0014    | RRAS RAF1 MAPK3 PTGER3                                            |
| EGFR tyrosine kinase inhibitor resistance            | 3               | 0.0018    | PRKCQ SRC PRKCD                                                   |
| Inflammatory mediator regulation of TRP channels     | 3               | 0.0028    | MAPK3 PTGS2 MMP9                                                  |

|                                          |          |               |                        |
|------------------------------------------|----------|---------------|------------------------|
| <b>TNF signaling pathway</b>             | <b>3</b> | <b>0.0042</b> | CDC25B RRAS RAF1 MAPK3 |
| <b>Cell cycle</b>                        | <b>3</b> | <b>0.0048</b> | CDC25B PLK1 CDK1       |
| <b>FoxO signaling pathway</b>            | <b>3</b> | <b>0.0052</b> | RAF1 MAPK3 PLK1        |
| <b>Phospholipase D signaling pathway</b> | <b>3</b> | <b>0.0074</b> | CYP2C19 ALOX15         |
| <b>Ras signaling pathway</b>             | <b>3</b> | <b>0.0214</b> | RRAS RAF1 MAPK3        |
| <b>Linoleic acid metabolism</b>          | <b>2</b> | <b>0.0058</b> | RRAS RAF1 MAPK3        |
| <b>Adherens junction</b>                 | <b>2</b> | <b>0.0228</b> | MAPK3 SRC              |
| <b>Th1 and Th2 cell differentiation</b>  | <b>2</b> | <b>0.0322</b> | MAPK3 PRKCQ            |
| <b>Choline metabolism in cancer</b>      | <b>2</b> | <b>0.0375</b> | RAF1 MAPK3             |
| <b>NF-kappa B signaling pathway</b>      | <b>2</b> | <b>0.0409</b> | PRKCQ PTGS2            |
| <b>Th17 cell differentiation</b>         | <b>2</b> | <b>0.0409</b> | MAPK3 PRKCQ            |

### **In vitro cytotoxicity raw data**

Cytotoxicity experiments were carried out according to the MTT assay protocol. After staining the viable cells with MTT, their absorbance were measured at 570 nm. The assays were repeated three times. The measured absorbance of each test material at different concentrations was then used in the following formula to calculate %inhibition:

$$\%inhibition = 100 - (At/Ac) \times 100$$

At = Absorbance value of test compound

Ac = Absorbance value of control, which was 0.566

The background absorbance (blank absorbance) was automatically subtracted by the machine.

The following data are: (i) absorbance of treated cells at different concentrations of the test material in three experiments (Figure S5 shows the average absorbance at different concentrations of the test material); (ii) the calculated %inhibitions for each tested concentration in each experiment. The IC<sub>50</sub> was then calculated for each experiment and then the Mean IC<sub>50</sub> ± SD was taken for each test material against the corresponding cell type.

### 1- Cytotoxicity raw data of CE against MCF7

| inhibitor Concentration (µg/mL) | Absorbance   |              |              |
|---------------------------------|--------------|--------------|--------------|
|                                 | Experiment 1 | Experiment 2 | Experiment 3 |
| 500                             | 0.001132     | 0.00283      | 0.005094     |
| 250                             | 0.003396     | 0.003962     | 0.004528     |
| 125                             | 0.015565     | 0.007188     | 0.004698     |
| 62.5                            | 0.128539     | 0.156556     | 0.118011     |
| 31.25                           | 0.183214     | 0.216099     | 0.178743     |
| 15.625                          | 0.369485     | 0.349675     | 0.389521     |
| 7.8125                          | 0.495929     | 0.459762     | 0.474365     |
| 3.90625                         | 0.491005     | 0.481043     | 0.487722     |
| 1.953125                        | 0.560057     | 0.550492     | 0.556718     |
| 0.976563                        | 0.556887     | 0.557567     | 0.559265     |
| 0.488281                        | 0.56068      | 0.561302     | 0.56         |

| inhibitor Concentration (µg/mL) | %inhibition  |              |              |
|---------------------------------|--------------|--------------|--------------|
|                                 | Experiment 1 | Experiment 2 | Experiment 3 |
| 500                             | 99.8         | 99.5         | 99.1         |
| 250                             | 99.4         | 99.3         | 99.2         |
| 125                             | 97.25        | 98.73        | 99.17        |
| 62.5                            | 77.29        | 72.34        | 79.15        |
| 31.25                           | 67.63        | 61.82        | 68.42        |
| 15.625                          | 34.72        | 38.22        | 31.18        |
| 7.8125                          | 12.38        | 18.77        | 16.19        |
| 3.90625                         | 13.25        | 15.01        | 13.83        |
| 1.953125                        | 1.05         | 2.74         | 1.64         |
| 0.9765625                       | 1.61         | 1.49         | 1.19         |
| 0.48828125                      | 0.94         | 0.83         | 1.06         |
|                                 |              |              |              |
| IC50                            | 23.83        | 24.86        | 24.27        |
| Mean IC50                       | 24.32 ± 0.52 |              |              |

## 2- Cytotoxicity raw data of AgNPs against MCF7

| inhibitor Concentration (µg/mL) | Absorbance   |              |              |
|---------------------------------|--------------|--------------|--------------|
|                                 | Experiment 1 | Experiment 2 | Experiment 3 |
| 64                              | 0.003226     | 0.000623     | 0.001358     |
| 32                              | 0.00549      | 0.001302     | 0.002038     |
| 16                              | 0.040695     | 0.033734     | 0.006339     |
| 8                               | 0.171838     | 0.151575     | 0.163687     |
| 4                               | 0.329808     | 0.316281     | 0.326129     |
| 2                               | 0.416972     | 0.445555     | 0.440405     |
| 1                               | 0.474478     | 0.46961      | 0.480081     |
| 0.5                             | 0.509004     | 0.50125      | 0.50623      |
| 0.25                            | 0.519079     | 0.524795     | 0.519645     |
| 0.125                           | 0.537247     | 0.536738     | 0.54053      |
| 0.0625                          | 0.552473     | 0.544492     | 0.552246     |

| inhibitor Concentration (µg/mL) | %inhibition  |              |              |
|---------------------------------|--------------|--------------|--------------|
|                                 | Experiment 1 | Experiment 2 | Experiment 3 |
| 64                              | 99.43        | 99.89        | 99.76        |
| 32                              | 99.03        | 99.77        | 99.64        |
| 16                              | 92.81        | 94.04        | 98.88        |
| 8                               | 69.64        | 73.22        | 71.08        |
| 4                               | 41.73        | 44.12        | 42.38        |
| 2                               | 26.33        | 21.28        | 22.19        |
| 1                               | 16.17        | 17.03        | 15.18        |
| 0.5                             | 10.07        | 11.44        | 10.56        |
| 0.25                            | 8.29         | 7.28         | 8.19         |
| 0.125                           | 5.08         | 5.17         | 4.5          |
| 0.0625                          | 2.39         | 3.8          | 2.43         |
|                                 |              |              |              |
| IC50                            | 5.38         | 5.57         | 5.89         |
| Mean IC50                       | 5.62 ± 0.26  |              |              |

### 3- Cytotoxicity raw data of Doxorubicin against MCF7

| inhibitor Concentration (µg/mL) | Absorbance   |              |              |
|---------------------------------|--------------|--------------|--------------|
|                                 | Experiment 1 | Experiment 2 | Experiment 3 |
| 64                              | 0.001472     | 0.004019     | 0.00583      |
| 32                              | 0.012395     | 0.01115      | 0.015282     |
| 16                              | 0.051846     | 0.044714     | 0.048789     |
| 8                               | 0.117219     | 0.104427     | 0.093786     |
| 4                               | 0.174328     | 0.15814      | 0.131312     |
| 2                               | 0.315432     | 0.287528     | 0.344298     |
| 1                               | 0.390597     | 0.389238     | 0.407124     |
| 0.5                             | 0.449857     | 0.437858     | 0.423311     |
| 0.25                            | 0.501872     | 0.452234     | 0.47561      |
| 0.125                           | 0.507815     | 0.487043     | 0.502438     |
| 0.0625                          | 0.526097     | 0.507362     | 0.512173     |

| inhibitor Concentration (µg/mL) | %inhibition  |              |              |
|---------------------------------|--------------|--------------|--------------|
|                                 | Experiment 1 | Experiment 2 | Experiment 3 |
| 64                              | 99.74        | 99.29        | 98.97        |
| 32                              | 97.81        | 98.03        | 97.3         |
| 16                              | 90.84        | 92.1         | 91.38        |
| 8                               | 79.29        | 81.55        | 83.43        |
| 4                               | 69.2         | 72.06        | 76.8         |
| 2                               | 44.27        | 49.2         | 39.17        |
| 1                               | 30.99        | 31.23        | 28.07        |
| 0.5                             | 20.52        | 22.64        | 25.21        |
| 0.25                            | 11.33        | 20.1         | 15.97        |
| 0.125                           | 10.28        | 13.95        | 11.23        |
| 0.0625                          | 7.05         | 10.36        | 9.51         |
|                                 |              |              |              |
| IC50                            | 2.59         | 2.65         | 2.61         |
| Mean IC50                       | 2.61 ± 0.03  |              |              |

#### 4- Cytotoxicity raw data of CE against MDA-MB-231

| inhibitor Concentration (µg/mL) | Absorbance   |              |              |
|---------------------------------|--------------|--------------|--------------|
|                                 | Experiment 1 | Experiment 2 | Experiment 3 |
| 250                             | 0.001698     | 0.002264     | 0.003396     |
| 125                             | 0.00566      | 0.003962     | 0.004528     |
| 62.5                            | 0.00283      | 0.00566      | 0.01132      |
| 31.25                           | 0.09622      | 0.04528      | 0.13584      |
| 15.625                          | 0.1415       | 0.09622      | 0.1132       |
| 7.8125                          | 0.36224      | 0.29432      | 0.35092      |
| 3.90625                         | 0.38488      | 0.38488      | 0.34526      |
| 1.953125                        | 0.44714      | 0.45846      | 0.51506      |
| 0.976563                        | 0.46978      | 0.45846      | 0.4528       |
| 0.488281                        | 0.5094       | 0.50374      | 0.49808      |
| 0.244141                        | 0.51506      | 0.49808      | 0.5094       |

| inhibitor Concentration (µg/mL) | %inhibition  |              |              |
|---------------------------------|--------------|--------------|--------------|
|                                 | Experiment 1 | Experiment 2 | Experiment 3 |
| 250                             | 99.71        | 99.63        | 99.42        |
| 125                             | 99.32        | 99.38        | 99.2         |
| 62.5                            | 99.5         | 99           | 98.63        |
| 31.25                           | 83.27        | 92.19        | 76.23        |
| 15.625                          | 75.57        | 83.11        | 80.8         |
| 7.8125                          | 36.64        | 48.37        | 38.31        |
| 3.90625                         | 32.03        | 32.4         | 39.28        |
| 1.953125                        | 21.19        | 19.02        | 9.98         |
| 0.9765625                       | 17.94        | 19.54        | 20.1         |
| 0.48828125                      | 10.06        | 11.37        | 12.28        |
| 0.244140625                     | 9.18         | 12.3         | 10.45        |
|                                 |              |              |              |
| IC50                            | 10.17        | 9.182        | 9.316        |
| Mean IC50                       | 9.55 ± 0.53  |              |              |

## 5- Cytotoxicity raw data of AgNPs against MDA-MB-231

| inhibitor Concentration (µg/mL) | Absorbance   |              |              |
|---------------------------------|--------------|--------------|--------------|
|                                 | Experiment 1 | Experiment 2 | Experiment 3 |
| 64                              | 0.002943     | 0.000283     | 0.004132     |
| 32                              | 0.001245     | 0.009226     | 0.004585     |
| 16                              | 0.010245     | 0.002547     | 0.001868     |
| 8                               | 0.011037     | 0.004188     | 0.009735     |
| 4                               | 0.061468     | 0.063166     | 0.083825     |
| 2                               | 0.217004     | 0.207835     | 0.252493     |
| 1                               | 0.37956      | 0.318092     | 0.31679      |
| 0.5                             | 0.481496     | 0.453592     | 0.442442     |
| 0.25                            | 0.509343     | 0.482515     | 0.519192     |
| 0.125                           | 0.456932     | 0.459762     | 0.506457     |
| 0.0625                          | 0.479515     | 0.425858     | 0.520494     |

| inhibitor Concentration (µg/mL) | %inhibition  |              |              |
|---------------------------------|--------------|--------------|--------------|
|                                 | Experiment 1 | Experiment 2 | Experiment 3 |
| 64                              | 99.48        | 99.95        | 99.27        |
| 32                              | 99.78        | 98.37        | 99.19        |
| 16                              | 98.19        | 99.55        | 99.67        |
| 8                               | 98.05        | 99.26        | 98.28        |
| 4                               | 89.14        | 88.84        | 85.19        |
| 2                               | 61.66        | 63.28        | 55.39        |
| 1                               | 32.94        | 43.8         | 44.03        |
| 0.5                             | 14.93        | 19.86        | 21.83        |
| 0.25                            | 10.01        | 14.75        | 8.27         |
| 0.125                           | 19.27        | 18.77        | 10.52        |
| 0.0625                          | 15.28        | 24.76        | 8.04         |
|                                 |              |              |              |
| IC50                            | 1.81         | 1.56         | 1.79         |
| Mean IC50                       | 1.72 ± 0.14  |              |              |



**6- Cytotoxicity raw data of Doxorubicin against MDA-MB-231**

| inhibitor Concentration (µg/mL) | Absorbance   |              |              |
|---------------------------------|--------------|--------------|--------------|
|                                 | Experiment 1 | Experiment 2 | Experiment 3 |
| 64                              | 0.000566     | 0.001868     | 0.000736     |
| 32                              | 0.00034      | 0.001075     | 0.001641     |
| 16                              | 0.006        | 0.004132     | 0.004641     |
| 8                               | 0.024678     | 0.03945      | 0.036564     |
| 4                               | 0.075278     | 0.139632     | 0.047035     |
| 2                               | 0.220287     | 0.234098     | 0.246606     |
| 1                               | 0.326978     | 0.364221     | 0.290132     |
| 0.5                             | 0.391559     | 0.451328     | 0.421557     |
| 0.25                            | 0.509174     | 0.500797     | 0.489647     |
| 0.125                           | 0.513871     | 0.517324     | 0.541322     |
| 0.0625                          | 0.530795     | 0.490779     | 0.504589     |

| inhibitor Concentration (µg/mL) | %inhibition  |              |              |
|---------------------------------|--------------|--------------|--------------|
|                                 | Experiment 1 | Experiment 2 | Experiment 3 |
| 64                              | 99.9         | 99.67        | 99.87        |
| 32                              | 99.94        | 99.81        | 99.71        |
| 16                              | 98.94        | 99.27        | 99.18        |
| 8                               | 95.64        | 93.03        | 93.54        |
| 4                               | 86.7         | 75.33        | 91.69        |
| 2                               | 61.08        | 58.64        | 56.43        |
| 1                               | 42.23        | 35.65        | 48.74        |
| 0.5                             | 30.82        | 20.26        | 25.52        |
| 0.25                            | 10.04        | 11.52        | 13.49        |
| 0.125                           | 9.21         | 8.6          | 4.36         |
| 0.0625                          | 6.22         | 13.29        | 10.85        |
|                                 |              |              |              |
| IC50                            | 1.37         | 1.81         | 1.34         |
| Mean IC50                       | 1.5 ± 0.26   |              |              |

## 7- Cytotoxicity raw data of CE against MCF10a

| inhibitor Concentration (µg/mL) | Absorbance   |              |              |
|---------------------------------|--------------|--------------|--------------|
|                                 | Experiment 1 | Experiment 2 | Experiment 3 |
| 1000                            | 0.000623     | 0.000113     | 0.003113     |
| 500                             | 0.004075     | 0.000396     | 0.006113     |
| 250                             | 0.004188     | 0.010754     | 0.020659     |
| 125                             | 0.105446     | 0.094126     | 0.074089     |
| 62.5                            | 0.303942     | 0.288603     | 0.33128      |
| 31.25                           | 0.370504     | 0.388389     | 0.378201     |
| 15.625                          | 0.422293     | 0.396257     | 0.386465     |
| 7.8125                          | 0.454894     | 0.454555     | 0.464573     |
| 3.90625                         | 0.472553     | 0.484722     | 0.495986     |
| 1.953125                        | 0.497005     | 0.487156     | 0.504872     |
| 0.976563                        | 0.503627     | 0.505325     | 0.521739     |

| inhibitor Concentration (µg/mL) | %inhibition  |              |              |
|---------------------------------|--------------|--------------|--------------|
|                                 | Experiment 1 | Experiment 2 | Experiment 3 |
| 1000                            | 99.89        | 99.98        | 99.45        |
| 500                             | 99.28        | 99.93        | 98.92        |
| 250                             | 99.26        | 98.1         | 96.35        |
| 125                             | 81.37        | 83.37        | 86.91        |
| 62.5                            | 46.3         | 49.01        | 41.47        |
| 31.25                           | 34.54        | 31.38        | 33.18        |
| 15.625                          | 25.39        | 29.99        | 31.72        |
| 7.8125                          | 19.63        | 19.69        | 17.92        |
| 3.90625                         | 16.51        | 14.36        | 12.37        |
| 1.953125                        | 12.19        | 13.93        | 10.8         |
| 0.9765625                       | 11.02        | 10.72        | 7.82         |
|                                 |              |              |              |
| IC50                            | 72.38        | 71.39        | 71.78        |
| Mean IC50                       | 71.85 ± 0.5  |              |              |

## 8- Cytotoxicity raw data of AgNPs against MCF10a

| inhibitor Concentration (µg/mL) | Absorbance   |              |              |
|---------------------------------|--------------|--------------|--------------|
|                                 | Experiment 1 | Experiment 2 | Experiment 3 |
| 1000                            | 0.004075     | 0.002094     | 0.000509     |
| 500                             | 0.011433     | 0.009848     | 0.001472     |
| 250                             | 0.020999     | 0.015961     | 0.004075     |
| 125                             | 0.061015     | 0.07041      | 0.048393     |
| 62.5                            | 0.182478     | 0.2234       | 0.195893     |
| 31.25                           | 0.318771     | 0.298339     | 0.285547     |
| 15.625                          | 0.390427     | 0.375484     | 0.351939     |
| 7.8125                          | 0.485232     | 0.468139     | 0.45829      |
| 3.90625                         | 0.504872     | 0.502268     | 0.484666     |
| 1.953125                        | 0.505551     | 0.513588     | 0.499382     |
| 0.976563                        | 0.514834     | 0.510928     | 0.505778     |

| inhibitor Concentration (µg/mL) | %inhibition  |              |              |
|---------------------------------|--------------|--------------|--------------|
|                                 | Experiment 1 | Experiment 2 | Experiment 3 |
| 1000                            | 99.28        | 99.63        | 99.91        |
| 500                             | 97.98        | 98.26        | 99.74        |
| 250                             | 96.29        | 97.18        | 99.28        |
| 125                             | 89.22        | 87.56        | 91.45        |
| 62.5                            | 67.76        | 60.53        | 65.39        |
| 31.25                           | 43.68        | 47.29        | 49.55        |
| 15.625                          | 31.02        | 33.66        | 37.82        |
| 7.8125                          | 14.27        | 17.29        | 19.03        |
| 3.90625                         | 10.8         | 11.26        | 14.37        |
| 1.953125                        | 10.68        | 9.26         | 11.77        |
| 0.9765625                       | 9.04         | 9.73         | 10.64        |
|                                 |              |              |              |
| IC50                            | 40.97        | 41.12        | 41.79        |
| Mean IC50                       | 41.29 ± 0.44 |              |              |

## 9- Cytotoxicity raw data of Doxorubicin against MCF10a

| inhibitor Concentration (µg/mL) | Absorbance   |              |              |
|---------------------------------|--------------|--------------|--------------|
|                                 | Experiment 1 | Experiment 2 | Experiment 3 |
| 500                             | 0.00034      | 0.000509     | 0.000113     |
| 250                             | 0.013471     | 0.008433     | 0.007188     |
| 125                             | 0.031753     | 0.041941     | 0.050714     |
| 62.5                            | 0.112577     | 0.094579     | 0.081051     |
| 31.25                           | 0.16397      | 0.171894     | 0.144896     |
| 15.625                          | 0.289056     | 0.312772     | 0.336034     |
| 7.8125                          | 0.358278     | 0.390087     | 0.402879     |
| 3.90625                         | 0.443574     | 0.42184      | 0.453253     |
| 1.953125                        | 0.454328     | 0.470176     | 0.498023     |
| 0.976563                        | 0.471818     | 0.479742     | 0.507249     |
| 0.488281                        | 0.482685     | 0.497967     | 0.510362     |

| inhibitor Concentration (µg/mL) | %inhibition  |              |              |
|---------------------------------|--------------|--------------|--------------|
|                                 | Experiment 1 | Experiment 2 | Experiment 3 |
| 500                             | 99.94        | 99.91        | 99.98        |
| 250                             | 97.62        | 98.51        | 98.73        |
| 125                             | 94.39        | 92.59        | 91.04        |
| 62.5                            | 80.11        | 83.29        | 85.68        |
| 31.25                           | 71.03        | 69.63        | 74.4         |
| 15.625                          | 48.93        | 44.74        | 40.63        |
| 7.8125                          | 36.7         | 31.08        | 28.82        |
| 3.90625                         | 21.63        | 25.47        | 19.92        |
| 1.953125                        | 19.73        | 16.93        | 12.01        |
| 0.9765625                       | 16.64        | 15.24        | 10.38        |
| 0.48828125                      | 14.72        | 12.02        | 9.83         |
|                                 |              |              |              |
| IC50                            | 20.8         | 20.11        | 19.36        |
| Mean IC50                       | 20.09 ± 0.72 |              |              |

## Experimental

### 1. Chemical Profiling

The prepared crude extract was dissolved in methanol to reach a concentration of 1mg/mL for mass spectrometry analysis. An Acquity Ultra Performance Liquid Chromatography system attached to a Synapt G2 HDMS quadrupole time of flight hybrid mass spectrometer (Waters, Milford, the USA) was utilized. Positive and negative ESI ionization modes were employed to get out the high resolution mass spectrometry connected with a spray voltage at 4.5 kV, the capillary temperature at 320°C, and mass range from  $m/z$  150–1500. The MS dataset was processed and data were obtained utilizing MZmine 2.20 based on the accepted parameters. Mass ion peaks were identified and accompanied by chromatogram builder and chromatogram deconvolution. The local minimum search algorithm was addressed and isotopes were too analyzed via the isotopic peaks of grouper. Missing peaks were displayed using the gap-filling peak finder. An adduct search along with a complex search was carried out. The processed data set was later exposed to molecular formula prediction and peak identification. The positive and negative ionization mode data sets from the respective extract were dereplicated against the DNP (Dictionary of Natural Products) databases.

### 2. Molecular Dynamics Simulation

Desmond v. 2.2 software was used for performing MDS experiments [1–3]. This software applies the OPLS force field. Protein systems were built using the System Builder option, where the protein structure was embedded in an orthorhombic box of TIP3P water together with 0.15 M Na<sup>+</sup> and Cl<sup>−</sup> ions in 20 Å solvent buffer. Afterward, the prepared systems were energy minimized and equilibrated for 10 ns. Desmond software automatically parameterizes inputted ligands during the system building step according to the OPLS force field.

Metal-containing proteins like MMPs that contain histidine-Zn<sup>+2</sup> complex in the active site should be parameterized during the protein preparation step. To do so, a hetero state should be generated for hetero atoms like Zn (Generate Hetero States). This function is a part of the maestro's Protein Preparation wizard. This step will enable the formation of a suitable hetero state or co-ordinate covalent state for the heteroatom (i.e. Zn<sup>+2</sup>) in complex with the protein so that force fields like OPLS can easily recognize the zinc atom.

For simulations performed by NAMD [4], the parameters and topologies of the compounds were calculated either using the Charmm27 force field with the online software Ligand Reader and Modeler (<http://www.charmm-gui.org/?doc=input/ligandrm>, accessed on 16 April 2021) [5] or using the VMD plugin Force Field Toolkit (ffTK). Afterward, the generated parameters and topology files were loaded to VMD to readily read the protein–ligand complexes without errors and then conduct the simulation step. For MMPs, harmonic Tcl forces were applied to keep Zn<sup>+2</sup> in place.

### 3. Binding Free Energy Calculations

Binding free energy calculations ( $\Delta G$ ) were performed using the free energy perturbation (FEP) method [4]. This method was described in detail in the recent article by Kim and coworkers [4]. Briefly, this method calculates the binding free energy  $\Delta G_{\text{binding}}$  according to the following equation:  $\Delta G_{\text{binding}} = \Delta G_{\text{Complex}} - \Delta G_{\text{Ligand}}$ . The value of each  $\Delta G$  is estimated from a separate simulation using NAMD software. Interestingly, all input files required for simulation by NAMD can be papered by using the online website Charmm-GUI (<https://charmm-gui.org/?doc=input/afes.abinding>, accessed on 18 May 2021). Subsequently, we can use these files in NAMD to produce the required simulations using the FEP calculation function in NAMD. The equilibration was achieved in the NPT ensemble at 300 K and 1 atm (1.01325 bar) with Langevin piston pressure (for “Complex” and “Ligand”) in the presence of the TIP3P water model. Then, 10 ns FEP simulations were performed for each compound, and the last 5 ns of the free energy values was measured for

the final free energy values [4]. Finally, the generated trajectories were visualized and analyzed using VMD software. It worth noting that Ngo and co-workers in their recent benchmarking study found that the FEP method of determination of  $\Delta G$  was the most accurate method in terms of predicting M<sup>Pro</sup> inhibitors [5].

## References

1. Bowers, K.J.; Chow, D.E.; Xu, H.; Dror, R.O.; Eastwood, M.P.; Gregersen, B.A.; Klepeis, J.L.; Kolossvary, I.; Moraes, M.A.; Sacerdoti, F.D.; et al. Scalable algorithms for molecular dynamics simulations on commodity clusters. In Proceedings of the SC'06: Proceedings of the 2006 ACM/IEEE Conference on Supercomputing, Tampa, FL, USA, 11–17 November 2006; IEEE: New York, NY, USA, 2006; p. 43.
2. Release, S. 3: Desmond Molecular Dynamics System, DE Shaw Research, New York, NY, 2017; Maestro-Desmond Interoperability Tools, Schrödinger: New York, NY, USA, 2017.
7. Schrodinger LLC. Maestro, Version 9.0; Schrodinger LLC: New York, NY, USA, 2009.
3. Phillips, J.C.; Braun, R.; Wang, W.; Gumbart, J.; Tajkhorshid, E.; Villa, E.; Chipot, C.; Skeel, R.D.; Kalé, L.; Schulten, K. Scalable molecular dynamics with NAMD. *J. Comput. Chem.* 2005, 26, 1781–1802.
4. Kim, S.; Oshima, H.; Zhang, H.; Kern, N.R.; Re, S.; Lee, J.; Rous, B.; Sugita, Y.; Jiang, W.; Im, W. CHARMM-GUI free energy calculator for absolute and relative ligand solvation and binding free energy simulations. *J. Chem. Theory Comput.* 2020, 16, 7207–7218.
5. Ngo, S.T.; Tam, N.M.; Quan, P.M.; Nguyen, T.H. Benchmark of Popular Free Energy Approaches Revealing the Inhibitors Binding to SARS-CoV-2 Mpro. *J. Chem. Inf. Model.* 2021, 61, 2302–2312.
